# Supplementary material for: AKIRIN1: A Potential New Reference Gene in Human Natural Killer Cells and Granulocytes in Sepsis
Source: PubMed Central journal article supplement (PMC6539838; doi:10.3390/ijms20092290), 2019-05-09
Supplement: ijms-20-02290-s001.pdf [file ijms-20-02290-s001.pdf]

## SUPPLEMENTARY TABLES

**Supplementary Table S1** summarizes demographic and clinical characteristics of critically ill patients enrolled in this study.

**Supplementary Table S2** identifies the fluorochromes and conjugated monoclonal antibodies used in flow cytometry. MACS isolated cells were analyzed with panels 1 and 2 in discovery set samples. For validation set and healthy donor cell samples, these were combined into panel 3.

**Table S1.** Demographic and clinical patient characteristics.

|                                        | Discovery (August 2012 – April 2014)     |                        |                    |
|----------------------------------------|------------------------------------------|------------------------|--------------------|
|                                        | Presurgical<br>(n = 20)                  | SIRS<br>(n = 19)       | Sepsis<br>(n = 20) |
| Age (years) <sup>1</sup>               | 63.7 ± 12.0                              | 61.8 ± 16.7            | 61.8 ± 16.7        |
| Sex (Male/Female)                      | 10/10                                    | 14/5                   | 10/10              |
| SOFA <sup>2</sup> score <sup>1</sup>   | na <sup>3</sup>                          | 5.1 ± 2.5              | 13.3 ± 3.1****     |
| Lactate (mmol/L) <sup>1</sup>          | na                                       | 2.2 ± 1.9 <sup>4</sup> | 3.2 ± 2.0          |
| ICU length of stay (days) <sup>1</sup> | na                                       | 8.6 ± 11.8             | 13.3 ± 8.6         |
| ICU mortality (n)                      | na                                       | 0                      | 6                  |
|                                        | Validation (September 2016 – April 2017) |                        |                    |
|                                        | SIRS<br>(n = 22)                         | Sepsis<br>(n = 23)     |                    |
| Age (years)                            | 66.3 ± 14.9                              | 67.7 ± 14.6            |                    |
| Sex (Male/Female)                      | 16/6                                     | 10/13                  |                    |
| SOFA score                             | 6.5 ± 2.9                                | 10.9 ± 2.5****         |                    |
| Lactate (mmol/L)                       | 1.9 ± 2.0 <sup>5</sup>                   | 2.9 ± 2.3*             |                    |
| ICU length of stay (days)              | 4.2 ± 4.9                                | 14.7 ± 15.1            |                    |
| ICU mortality (n)                      | 0                                        | 7                      |                    |

<sup>1</sup> Data are represented as mean ± standard deviation.

<sup>2</sup> SOFA score, sequential organ failure assessment score

<sup>3</sup> na, not available

<sup>4</sup> For one out of the 19 SIRS patients, Lactate levels were not available.

<sup>5</sup> For six out of the 22 SIRS patients, Lactate levels were not available.

\*  $p < 0.05$  from Wilcoxon rank-sum test, \*\*\*\*  $p < 0.0001$  from Wilcoxon rank-sum test.

**Table S2.** Specifications for monoclonal antibody-fluorochrome conjugates and their combinations used in flow cytometry.

| Antigen | Clone     | Fluorochrome |
|---------|-----------|--------------|
| Panel 1 |           |              |
| CD14    | MφP9      | FITC         |
| CD45    | 2D1       | PerCP        |
| CD15    | H198      | APC          |
| Panel 2 |           |              |
| CD14    | MφP9      | FITC         |
| CD56    | NCAM 16.2 | PE           |
| CD3     | SK7       | PerCP        |
| CD19    | SJ25C1    | APC-Cy7      |
| Panel 3 |           |              |
| CD3     | UCHT1     | FITC         |
| CD56    | NCAM 16.2 | PE           |
| CD45    | 2D1       | PerCP        |
| CD15    | H198      | APC          |
| CD19    | SJ25C1    | APC-Cy7      |
| CD16    | B73.1     | PE-Cy7       |
| CD14    | MφP9      | BV421        |
